# Supplementary material
Source: Elsevier journal article supplement (https://www.sciencedirect.com/science/article/pii/S0211139X22000397)
Supplement: mmc1 [file S0211139X22000397:mmc1.doc]

Table 1s. Types of surgery and classification of complexity according to the Modified Johns Hopkins Surgical criteria

| **Complexity** | **General surgery** | **Urology** | **Vascular surgery** | **Total** |
| --- | --- | --- | --- | --- |
| **Grade I**  Minimal to moderately invasive procedures | Hernia repair (7.69%) | Ureteroscopic extraction of calculus 3.85%)  Postectomy (3.85%) |  | 15.4% |
| **Grade II**  Moderate to significantly invasive procedures | Thyroidectomy (3.85%) | Transurethral resection (11.54%) | Peripheral endovascular surgery (19.22%) | 34.6% |
| **Grade III**  Highly invasive procedures | Major reconstruction of gastrointestinal tract (34.61%) | Major genitourinary surgery (7.69%) | Major vascular repair (3.85%)  Carotid surgery (3.85%) | 50% |
| **Total** | 46.15% | 26.93% | 26.92% | 100% |
